# Supplementary material for: Impact of HPV vaccination with Gardasil® in Switzerland
Source: PubMed Central journal article supplement (PMC5741926; doi:10.1186/s12879-017-2867-x), 2017-12-22
Supplement: 12879_2017_2867_MOESM1_ESM.pdf [file 12879_2017_2867_MOESM1_ESM.pdf]

Additional file 1. Sub-study-1 flowchart and questionnaire results.

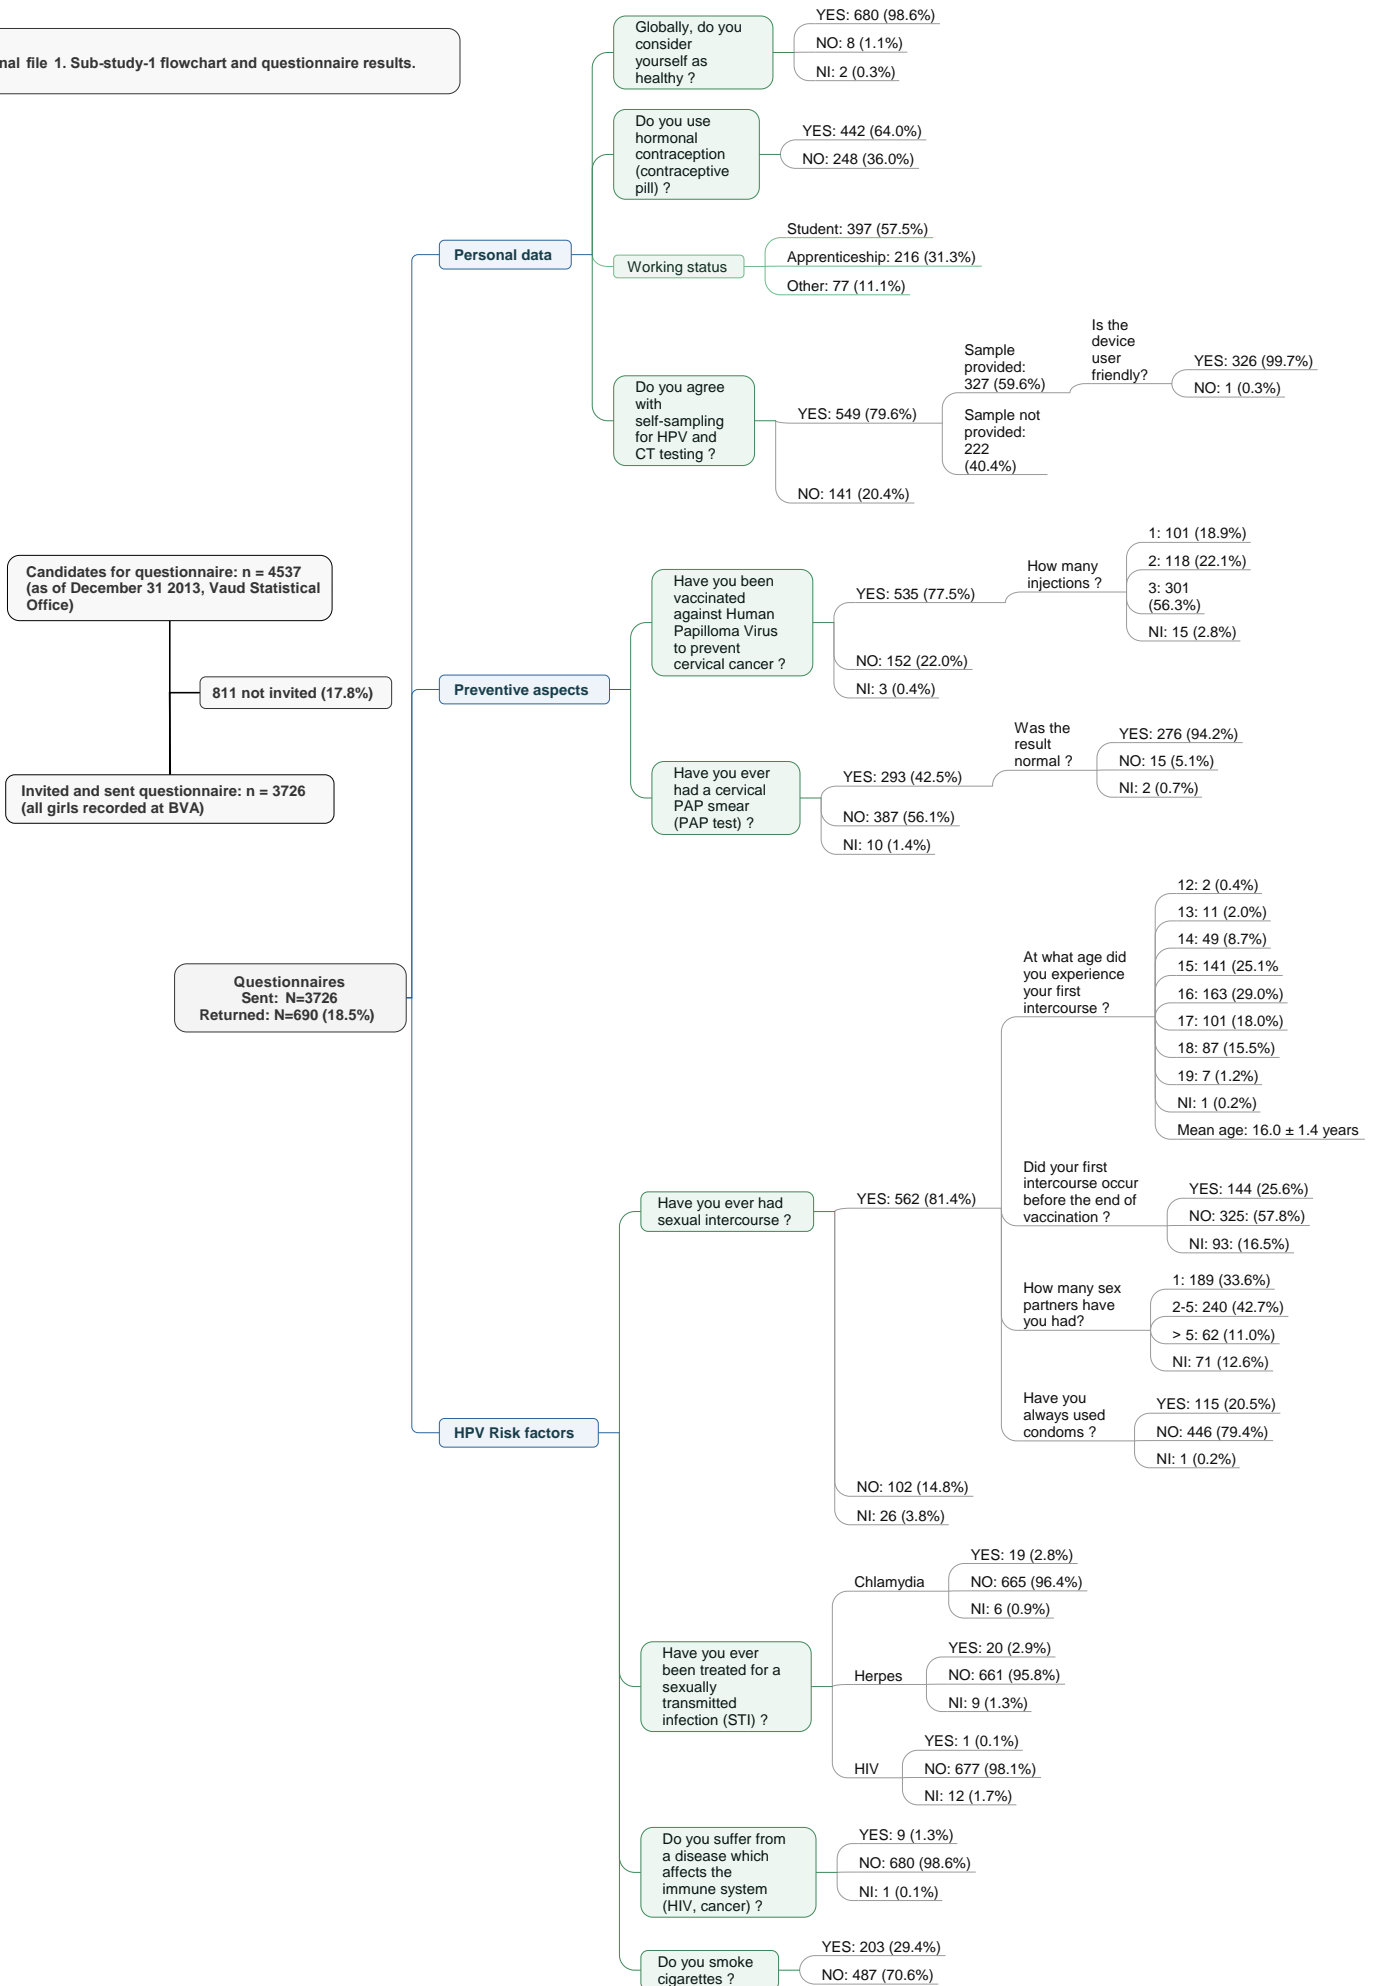

**Additional file 1. Sub-study-1 flow chart and questionnaire results.**

BVA: Bureau vaudois des adresses. This is an independent marketing organization that registers all individuals who agree to be contacted for any issue.

NI: non informative responses that were excluded from analysis (empty fields in questionnaires for specific items, inconsistent response such as not reporting PAP yet reporting a normal PAP result)

HPV: Human papillomavirus; CT: *Chlamydia trachomatis*; PAP: cervical smear stained with Papanicolaou reagent for cervical cancer screening; HIV: Human immunodeficiency virus
